# Supplementary material
Source: PubMed Central journal article supplement (PMC8862308)

# Supplement Figure 1

**A.**

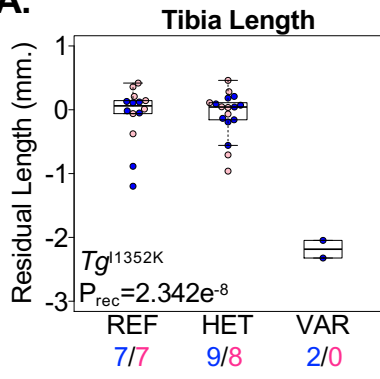

**B.**

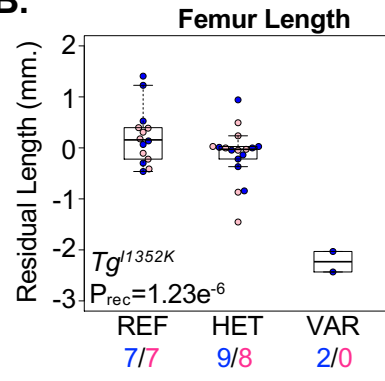

**C.**

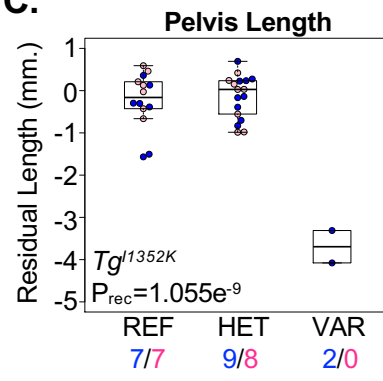

# Supplement Figure 2

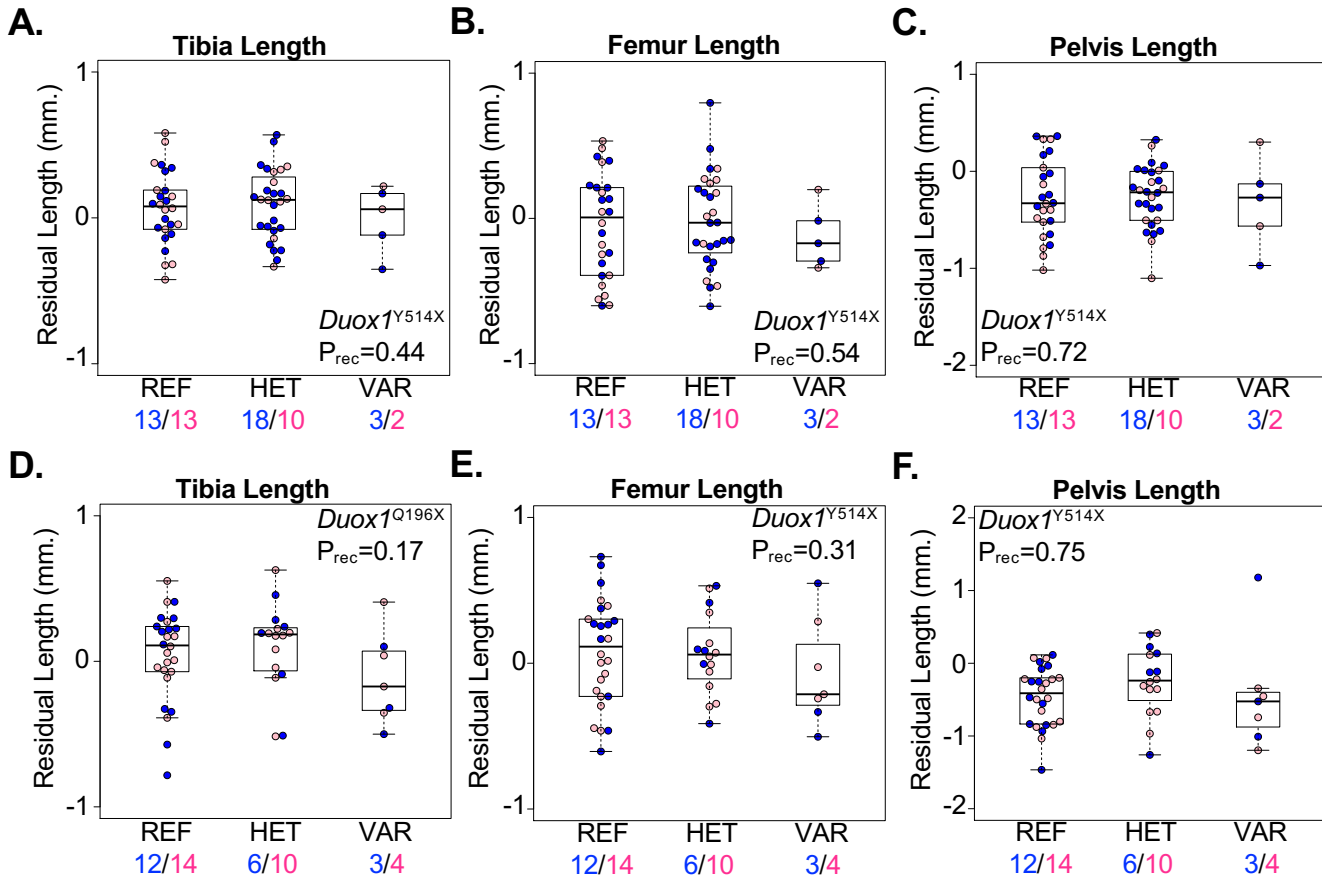

# Supplementary Figure 3

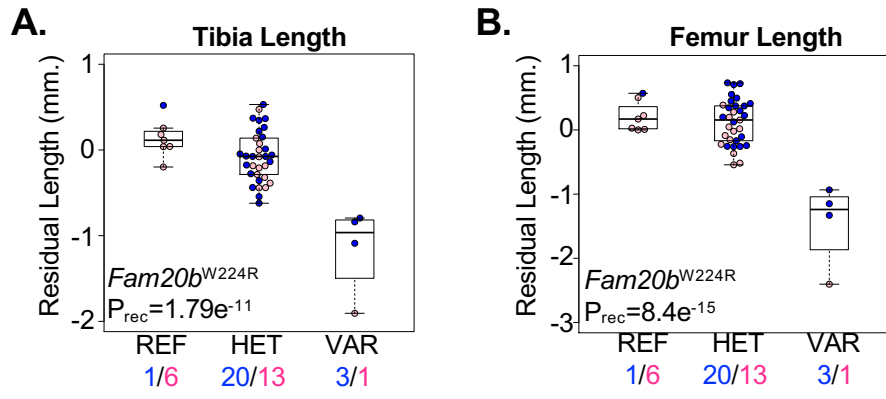

# Supplementary Figure 4

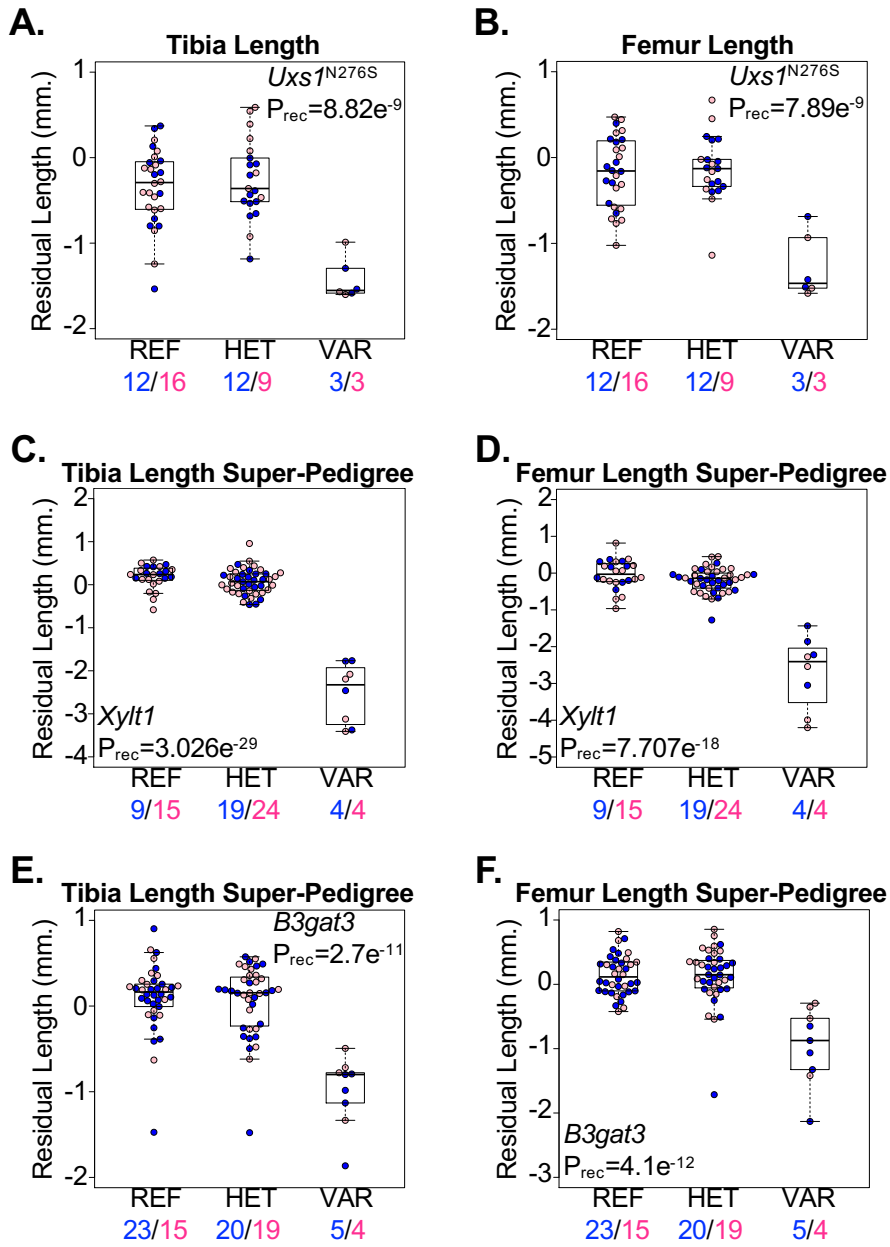

# Supplementary Figure 5

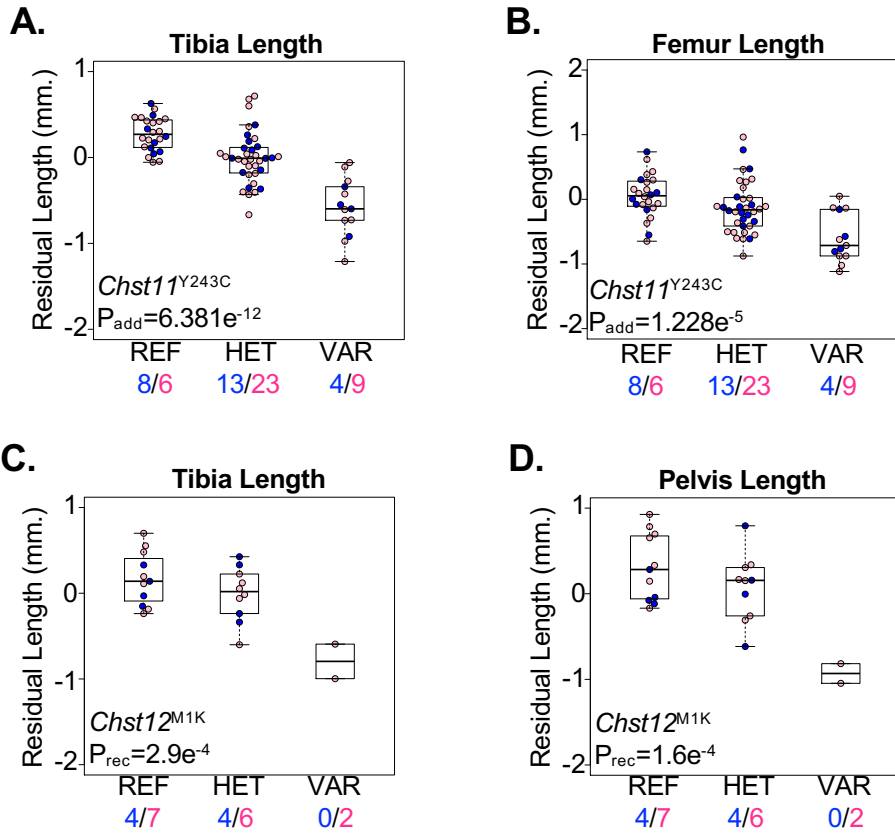

# Supplementary Figure 6

A.

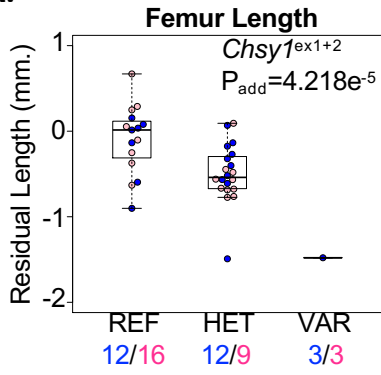

B.

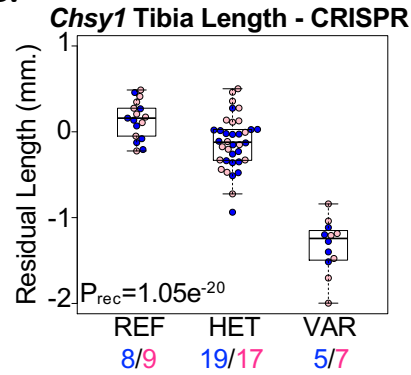

C.

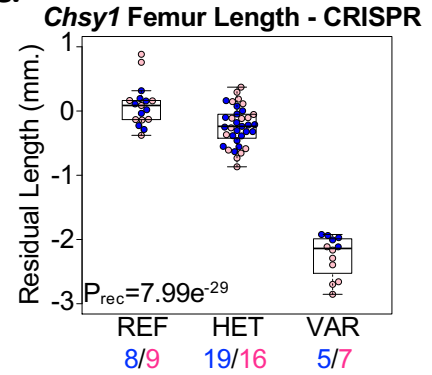

D.

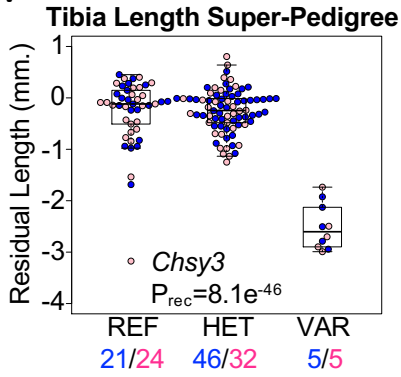

E.

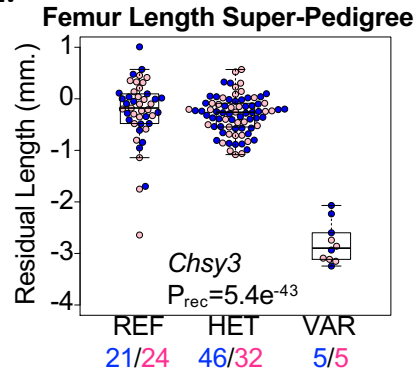

F.

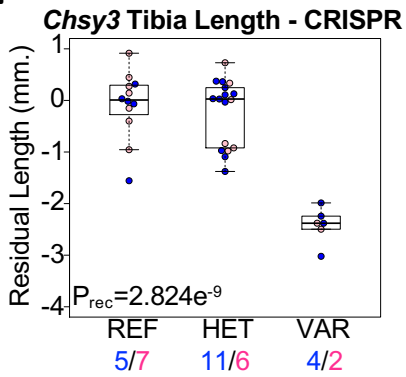

G.

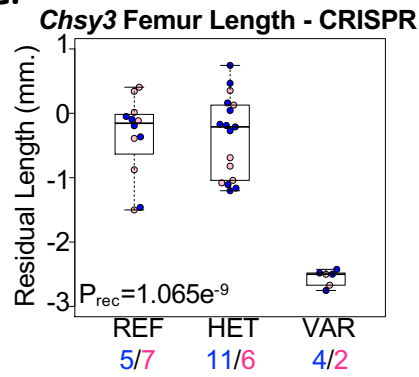

# Supplementary Figure 7

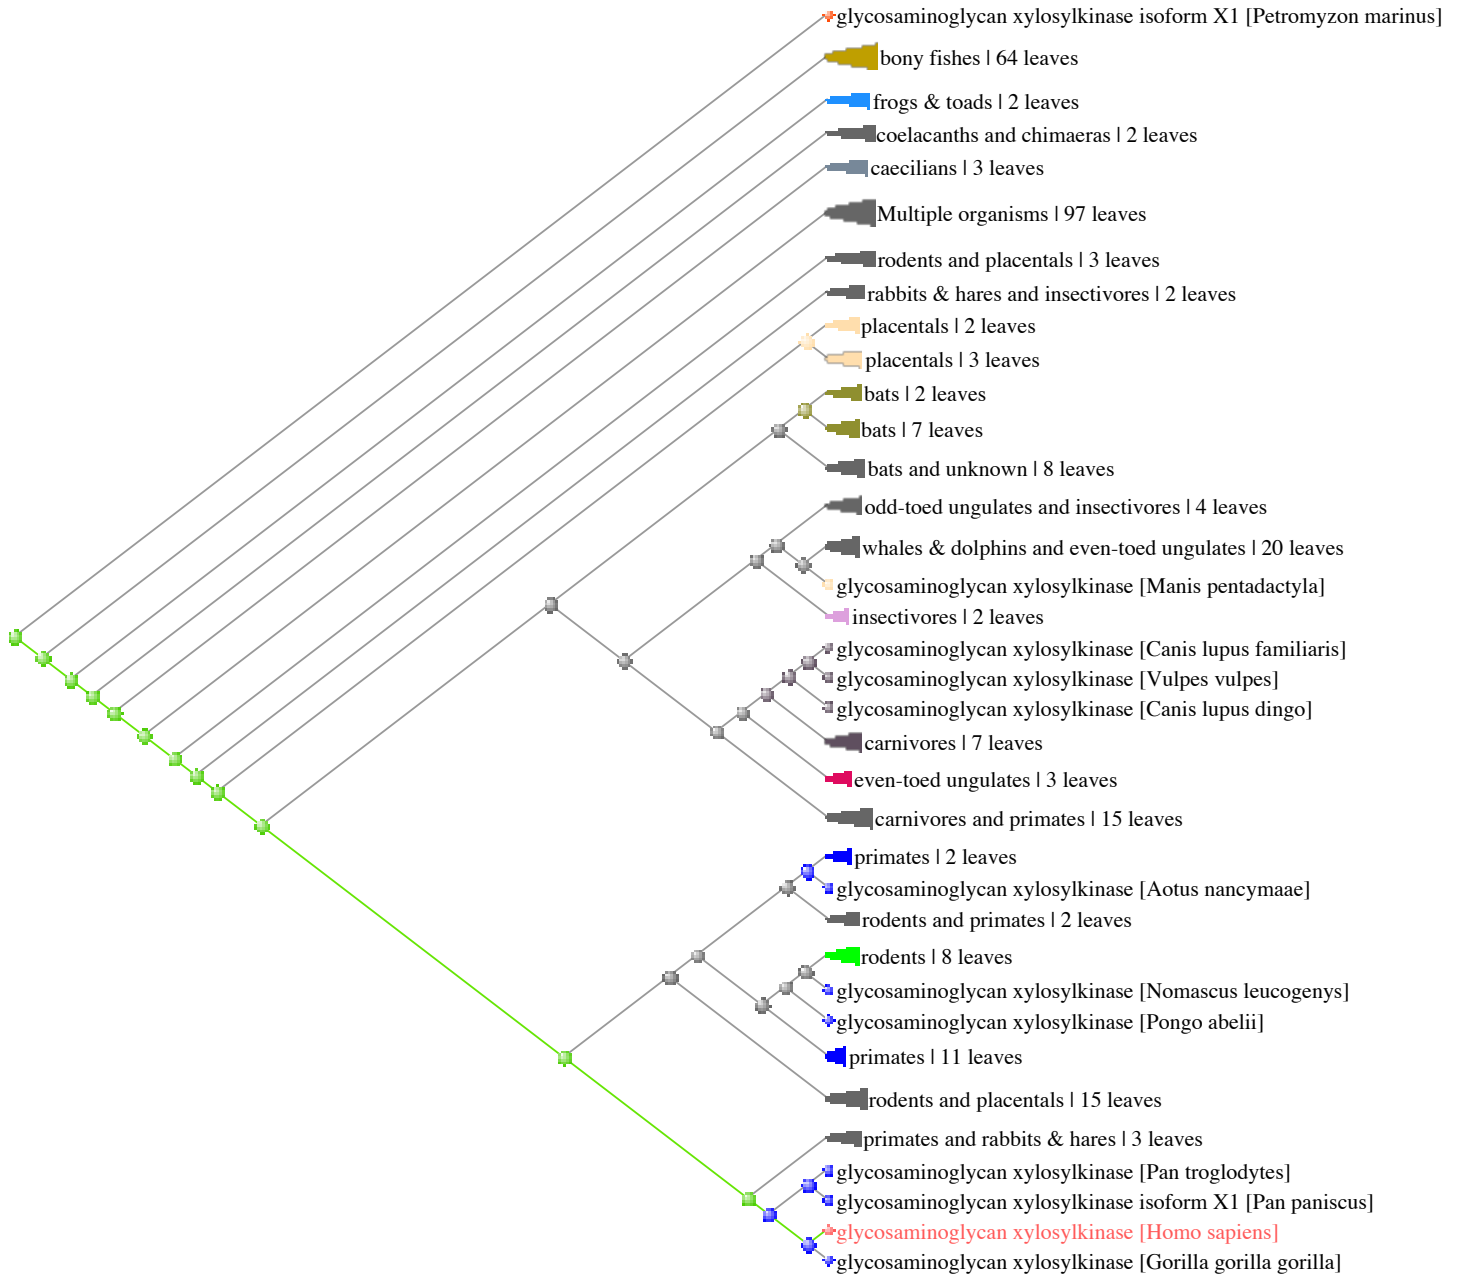

# Supplementary Figure 8

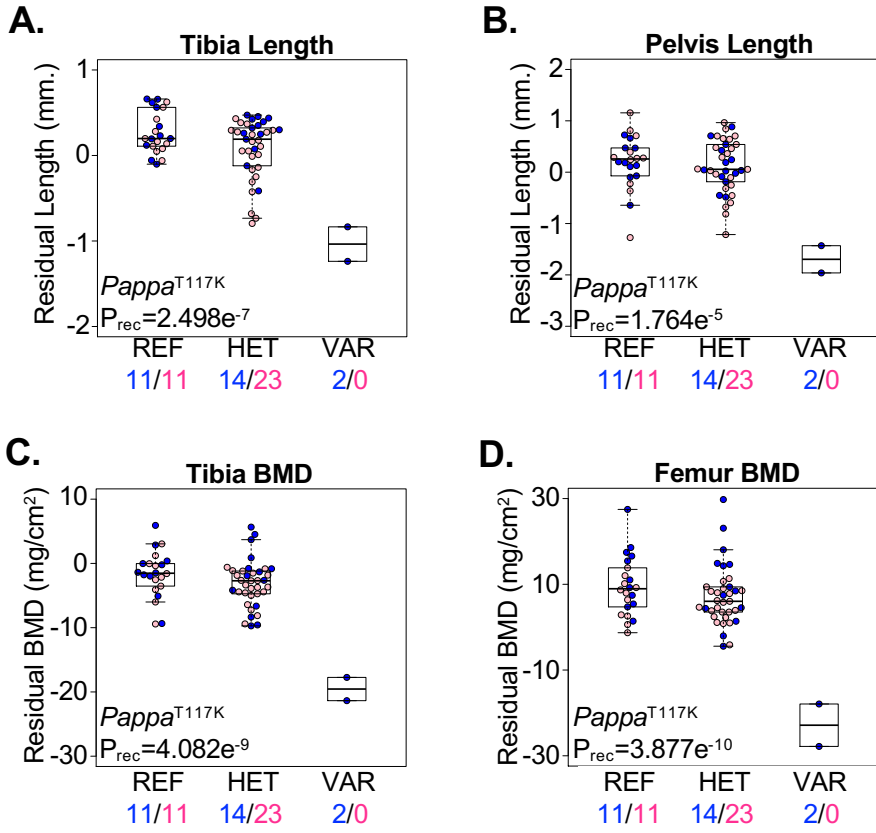



# Supplementary Figure 9

**A.**

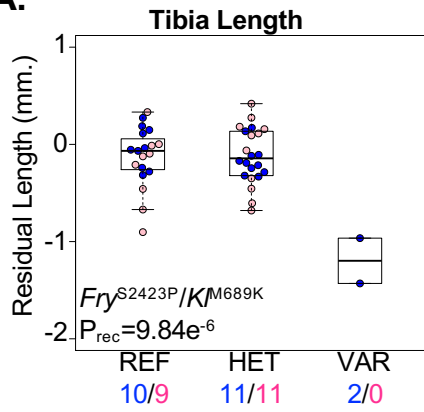

**B.**

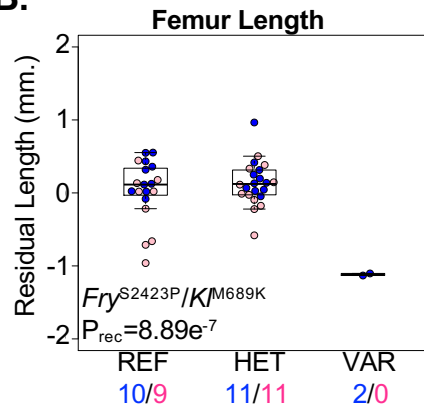

**C.**

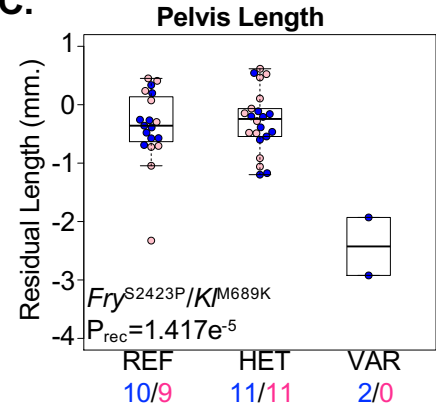

**D.**

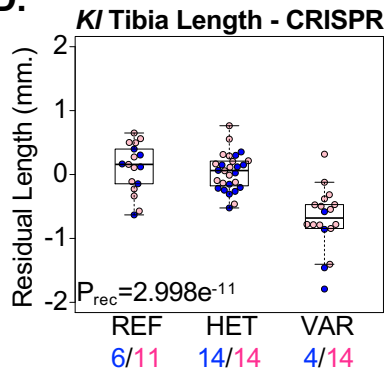

**E.**

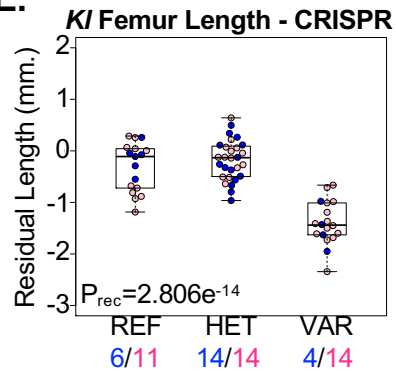

**F.**

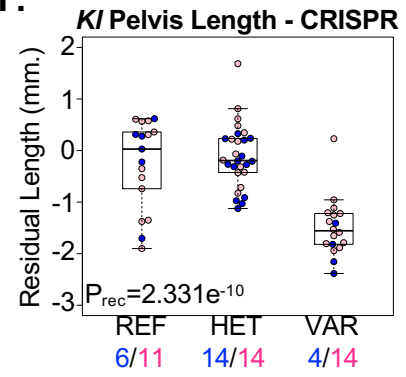

# Supplementary Figure 10

**A.**

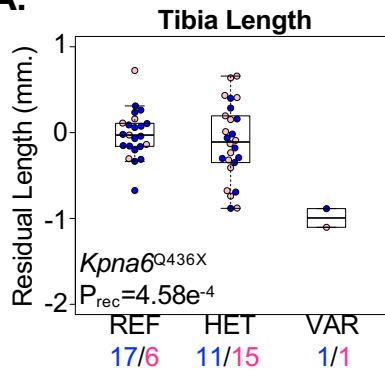

**B.**

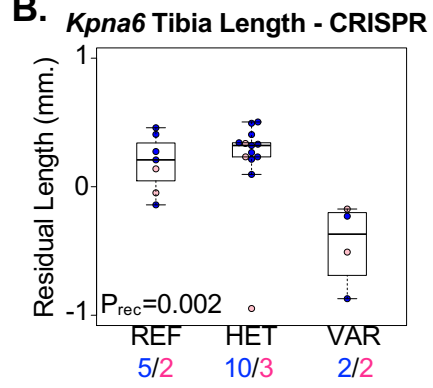

**C.**

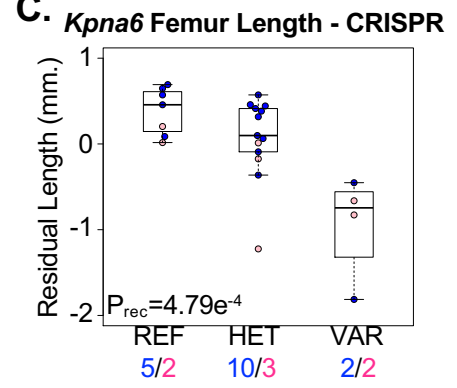

# Supplementary Figure 11

**A.**

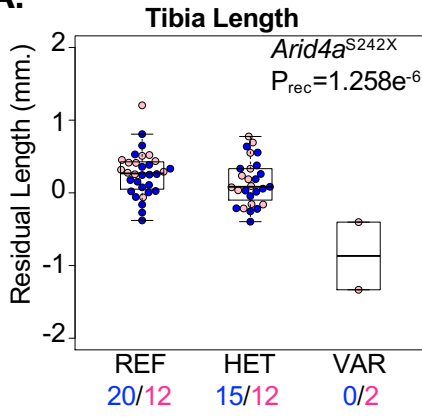

**B.**

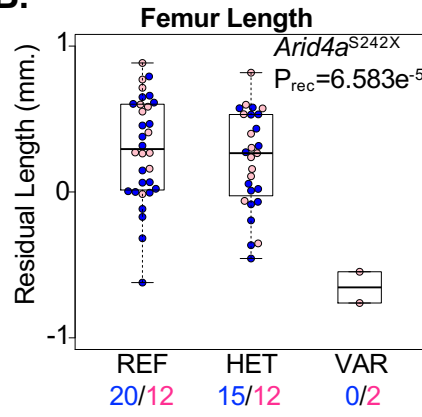

**C.**

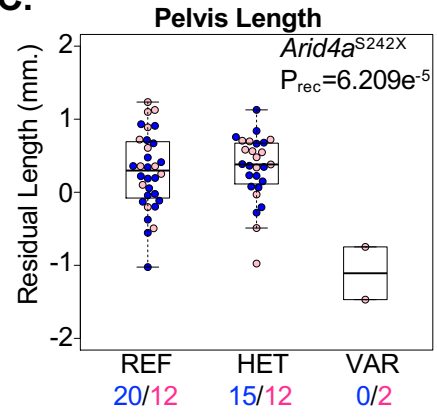

**D.**

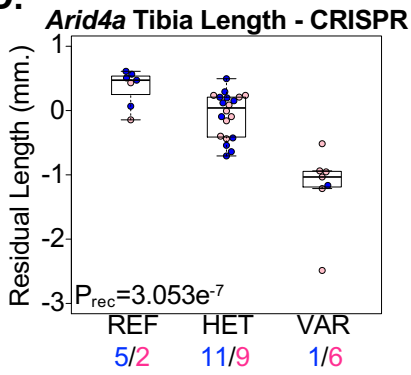

**E.**

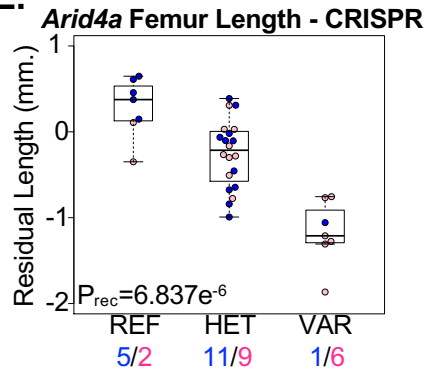

**F.**

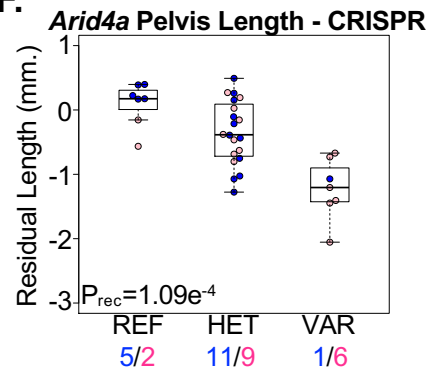

Supplement: NIHMS1777663-supplement-Supplementary_Figures.pdf [file NIHMS1777663-supplement-Supplementary_Figures.pdf]
